# Supplementary material for: Evaluation of the Content of Minerals, B-Group Vitamins, Tocols, and Carotenoids in Raw and In-House Cooked Wild Edible Plants
Source: MDPI journal article supplement (doi:10.3390/foods13030472), 2024-02-02
Supplement: s1 [file s1]

**Table S1.** Bias (%) for Ca, P, K, Na, Cu, Zn,  $\alpha$ -tocopherol, B1 and B2 vitamins as to values of certified reference materials.

| Compounds                       | Matrix reference value | Measured value    | Bias (%) |
|---------------------------------|------------------------|-------------------|----------|
| Ca (g/100g) *                   | 1.526 $\pm$ 0.066      | 1.494 $\pm$ 0.042 | -2.14    |
| P (g/100g)                      | 0.519 $\pm$ 0.001      | 0.533 $\pm$ 0.012 | 2,62     |
| K(g/100g)                       | 2.900 $\pm$ 0.026      | 2.770 $\pm$ 0.042 | -4.69    |
| Na (g/100g)                     | 1.821 $\pm$ 0.023      | 1.829 $\pm$ 0.036 | 0.44     |
| Cu (mg/Kg)                      | 12.22 $\pm$ 0.86       | 12.34 $\pm$ 0.45  | 0.97     |
| Zn(mg/Kg)                       | 82.30 $\pm$ 3.90       | 81.26 $\pm$ 1.27  | -1.28    |
| $\alpha$ -tocopherol (mg/kg) ** | 1350.0 $\pm$ 220       | 1450.3 $\pm$ 52.1 | 6.92     |
| B1 (mg/kg d.m.) °               | 3.07 $\pm$ 0.34        | 2.92 $\pm$ 0.15   | -5.13    |
| B1 (mg/kg d.m.) §               | 4.63 $\pm$ 0.39        | 4.36 $\pm$ 0.22   | -6.19    |
| B2 (mg/kg d.m.) §               | 0.90 $\pm$ 0.05        | 0.85 $\pm$ 0.06   | -5.88    |

\* Reference samples for mineral and trace elements: spinach leaves (SRM NIST-1570A); \*\* fortified breakfast cereal (SRM NIST-3233); ° mixed vegetables (CRM BCR-485); § wholemeal flour (CRM BCR-121); values are certified for B1 and declared for B2. For carotenoids a mixed vegetables reference sample (CRM BCR-485) was analysed (for details see [10,34]). Bias (%) = (measured value-reference value)/measured value X 100; d.m.: dry matter
